# Supplementary material for: Synthesis of nonlinear optical chromophores with isophorone-derived bridges for enhanced thermal stability and electro-optic activity
Source: Royal Society of Chemistry journal article supplement (doi:10.1039/d0tc01845g), 2020-01-01
Supplement: d0tc01845g1.pdf [file d0tc01845g1.pdf]

## Electronic supplementary information (ESI)

### Synthesis of nonlinear optical chromophores with isophorone-derived bridges for enhanced thermal stability and electro-optic activity

Fenggang Liu <sup>a\*</sup>, Songmin Mo <sup>a</sup>, Zhaofen Zhai <sup>a</sup>, Meishan Peng <sup>a</sup>, Shuangke Wu <sup>a</sup>, Chunling Li <sup>a</sup>, Canwen Yu <sup>a</sup> and Jianpeng Liu <sup>a</sup>

<sup>a</sup>School of Chemistry and Chemical Engineering, Guangzhou University, Guangzhou 510006, P. R. China. E-mail address: liufg6@gzhu.edu.cn

#### 1. Optical properties

Table s1 Optical Properties data of the chromophore.

| Cmpd      | $\lambda_{\max}^a$ | $\lambda_{\max}^b$ | $\lambda_{\max}^c$ | $\lambda_{\max}^d$ | $\lambda_{\max}^e$ |
|-----------|--------------------|--------------------|--------------------|--------------------|--------------------|
| <b>J1</b> | 753                | 666                | 688                | 688                | 688                |
| <b>J2</b> | 750                | 666                | 691                | 678                | 681                |
| <b>J3</b> | 762                | 667                | 688                | 689                | 689                |
| <b>J4</b> | 763                | 667                | 688                | 688                | 688                |

a, b, c, d, e (nm) was measured in chloroform, dioxane, toluene, acetone and acetonitrile, respectively.

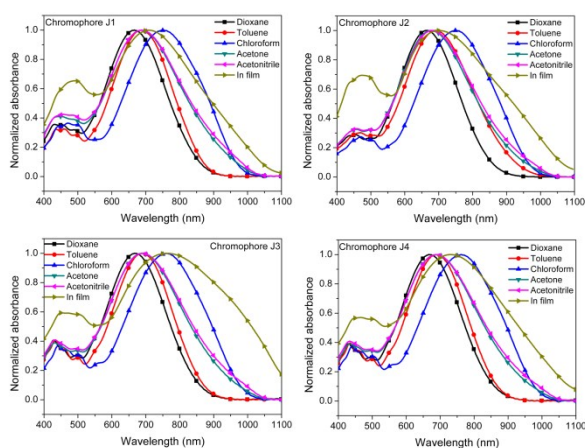

Fig. S1 UV-Vis absorption spectra of chromophores J1-J4 in five kinds of aprotic solvents with varying dielectric constants and in films.

## 2. Summary of DFT data

**Table s2** The Molecular Orbital Composition (%) in the Ground State for Chromophores J1-J4.

| Cmpd         | J1     |        | J2     |        | J3     |        | J4     |        |
|--------------|--------|--------|--------|--------|--------|--------|--------|--------|
|              | HOMO   | LUMO   | HOMO   | LUMO   | HOMO   | LUMO   | HOMO   | LUMO   |
| donor        | 64.50% | 13.39% | 55.06% | 17.21% | 64.45% | 13.50% | 65.18% | 13.28% |
| $\pi$ bridge | 23.88% | 40.35% | 26.25% | 40.50% | 22.70% | 39.29% | 22.27% | 39.33% |
| acceptor     | 11.62% | 46.27% | 15.74% | 41.71% | 11.15% | 45.97% | 10.84% | 46.16% |
| IGs          |        |        | 2.95%  | 0.57%  | 1.70%  | 1.24%  | 1.71%  | 1.23%  |

The molecular orbital composition was calculated using Multiwfn program with Ros-Schuit (SCPA) partition.

## 3. Optimized structures of chromophores

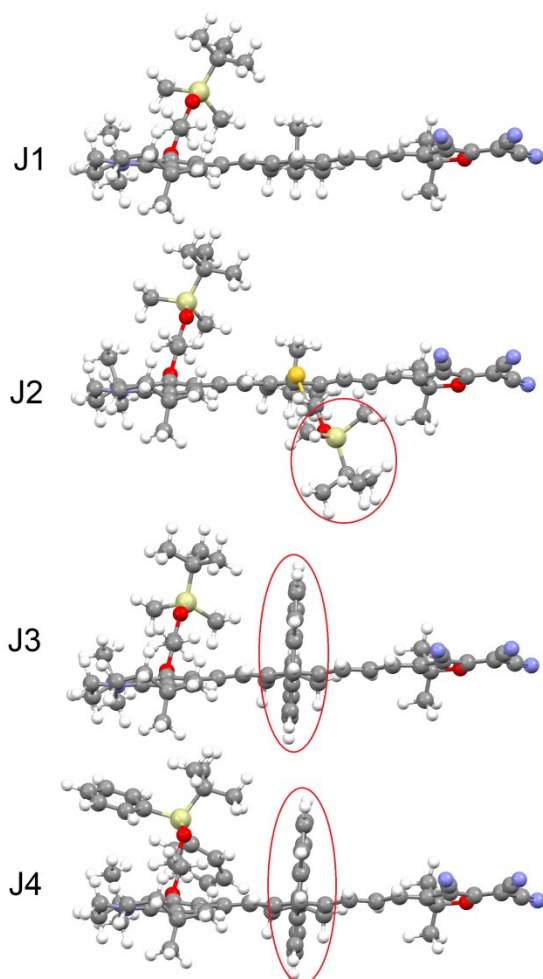

**Fig. s2** Optimized structures of chromophores J1-J4.

#### 4. Structure of chromophores A, A1, C, FLD1 and FLD4 and their electro-optic coefficients.

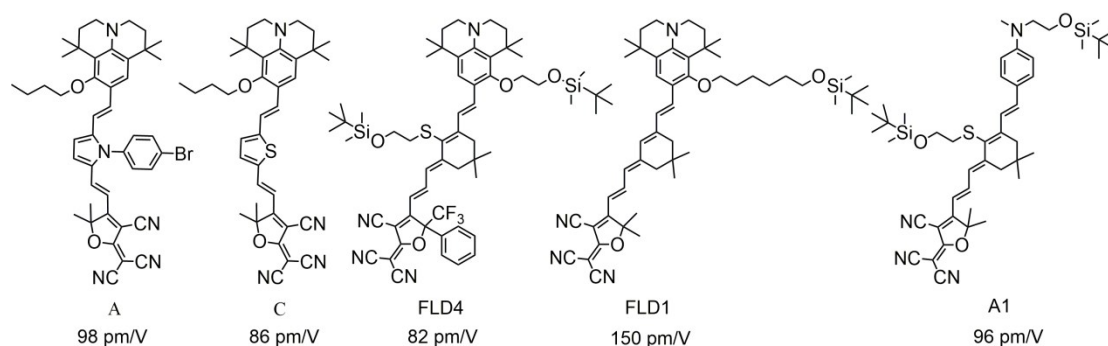

**Fig. S3** Structure of chromophores A, A1, C, FLD1 and FLD4 and their electro-optic coefficients.<sup>1-3</sup>

#### 5. Device Fabrication, poling and Testing.

Dibromomethane was dried over calcium chloride for several days then collected via vacuum distillation before use. ITO glass parameters: thickness = 45 nm; surface resistivity  $\leq 100$  ohms/square; transmission  $\geq 85\%$  at 1300-1500 nm.

Solutions of 8-10% weight EO material in dibromomethane were prepared and sonicated for 30min to dissolve, filtered through a 0.2  $\mu\text{m}$  PTFE filter, and spin cast onto ITO/glass substrates. EO films were spin cast in three stages: 550 rpm for 5 seconds, 900 rpm for 30 seconds, followed immediately by 1500 rpm for 25seconds. The films were then dried in a vacuum oven at 60 °C overnight. The thickness of the EO film was then measured to be around 1-2  $\mu\text{m}$ . Finally, patterned gold electrodes were deposited on top of the films by vacuum coating machine to complete the film device.

In general, for EO films, the electric field poling is conducted by applying an electric field at room temperature, heating the sample to its  $T_g$  and holding at that temperature for a few minutes ( $\sim 10$ ) until molecular orientation is complete, cooling to room temperature, and then remove the electric field. After poling and cooling to near room temperature, electro-optic coefficients for the poled films were measured using the Teng–Man technique on a custom apparatus at 1310 nm.<sup>4</sup>

#### Reference

1. F. Liu, H. Wang, Y. Yang, H. Xu, M. Zhang, A. Zhang, S. Bo, Z. Zhen, X. Liu and L. Qiu, *Journal of Materials Chemistry C*, 2014, **2**, 7785-7795.
2. F. Liu, H. Xu, H. Zhang, L. Chen, J. Liu, S. Bo, Z. Zhen, X. Liu and L. Qiu, *Dyes and Pigments*, 2016, **134**, 358-367.
3. F. Liu, S. Chen, S. Mo, G. Qin, C. Yu, W. Zhang, W.-J. Shi, P. Chen, H. Xu and M. Fu, *Journal of Materials Chemistry C*, 2019, **7**, 8019-8028.
4. H. Xu, F. Liu, D. L. Elder, L. E. Johnson, Y. de Coene, K. Clays, B. H. Robinson and L. R. Dalton, *Chemistry of Materials*, 2020, **32**, 1408-1421.
